# Supplementary material
Source: Springer Nature journal article supplement (https://www.springermedizin.de/resource/supplementary/13014_2007_118_MOESM1_ESM.pdf/9632946)

# FDG Mechanism in functional imaging

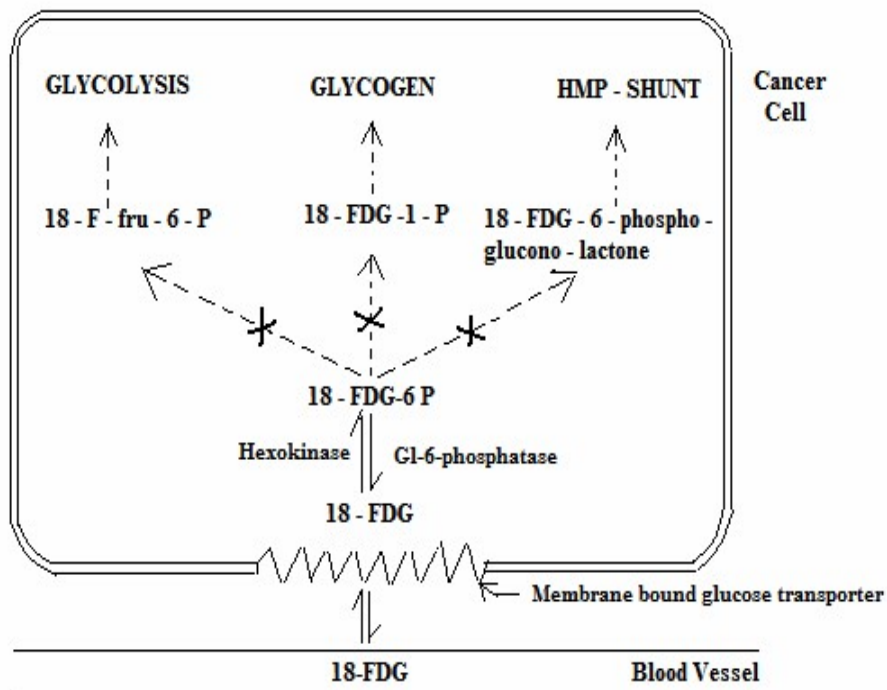

Supplement: MOESM1 [file 9632946]
